# Supplementary material for: Three mutations switch H7N9 influenza to human-type receptor specificity
Source: PubMed Central journal article supplement (PMC5472306; doi:10.1371/journal.ppat.1006390), 2017-06-15
Supplement: ppat.1006390.s002.pdf [file ppat.1006390.s002.pdf]

**S2 Table. Data collection and refinement statistics for the Sh2 H7 triple mutant (V186K, K193T, G228S)**

| Data set                             | <i>apo</i>                      | LSTc                            | LSTa                            |
|--------------------------------------|---------------------------------|---------------------------------|---------------------------------|
| Space group                          | R32                             | R32                             | R32                             |
| Unit cell (Å)                        | $a = b = 115.4,$<br>$c = 294.9$ | $a = b = 116.4,$<br>$c = 296.0$ | $a = b = 115.9,$<br>$c = 295.8$ |
| Resolution (Å) <sup>a</sup>          | 50.0-2.60<br>(2.64-2.60)        | 50.0-2.60<br>(2.64-2.60)        | 50.0-2.90<br>(2.95-2.90)        |
| X-ray source                         | APS 23ID-D                      | APS 23ID-D                      | APS 23ID-D                      |
| Unique reflections                   | 23,692                          | 24,049                          | 17,020                          |
| Redundancy <sup>a</sup>              | 4.0 (2.8)                       | 4.6 (3.1)                       | 5.3 (4.1)                       |
| Average $I/\sigma(I)$ <sup>a</sup>   | 16.4 (1.0)                      | 28.7 (1.0)                      | 18.3 (1.2)                      |
| Completeness <sup>a</sup>            | 99.3 (93.4)                     | 99.4 (96.7)                     | 99.3 (97.7)                     |
| $R_{\text{sym}}$ <sup>a,b</sup>      | 0.09 (0.66)                     | 0.08 (0.70)                     | 0.14 (0.93)                     |
| $R_{\text{pim}}$ <sup>a,b</sup>      | 0.05 (0.44)                     | 0.04 (0.44)                     | 0.06 (0.50)                     |
| $CC_{1/2}$ <sup>a,b</sup>            | 0.998 (0.548)                   | 0.998 (0.690)                   | 0.996 (0.457)                   |
| HA protomers in a.u.                 | 1                               | 1                               | 1                               |
| $V_m$ (Å <sup>3</sup> /Da)           | 3.3                             | 3.4                             | 3.4                             |
| Reflections in refinement            | 23,688                          | 24,028                          | 17,018                          |
| Refined residues                     | 483                             | 482                             | 485                             |
| Refined waters                       | 71                              | 31                              | 10                              |
| Refined ligand atoms                 | -                               | 22                              | 22                              |
| $R_{\text{cryst}}$ <sup>c</sup>      | 0.203                           | 0.218                           | 0.201                           |
| $R_{\text{free}}$ <sup>d</sup>       | 0.251                           | 0.277                           | 0.244                           |
| <b>B-values (Å<sup>2</sup>)</b>      |                                 |                                 |                                 |
| Protein                              | 84                              | 99                              | 100                             |
| Ligand                               | -                               | 124                             | 152                             |
| Waters                               | 66                              | 83                              | 68                              |
| Wilson B-values (Å <sup>2</sup> )    | 79                              | 86                              | 94                              |
| Ramachandran values (%) <sup>e</sup> | 96.9, 0                         | 96.2, 0.2                       | 97.1, 0                         |
| r.m.s.d. bond (Å)                    | 0.012                           | 0.013                           | 0.012                           |
| r.m.s.d. angle (deg.)                | 1.67                            | 1.91                            | 1.77                            |
| PDB codes                            | 5VJK                            | 5VJL                            | 5VJM                            |

<sup>a</sup> Parentheses denote outer-shell statistics.

<sup>b</sup>  $R_{\text{sym}} = \sum_{hkl} \sum_i |I_{hkl,i} - \langle I_{hkl} \rangle| / \sum_{hkl} \sum_i I_{hkl,i}$  and  $R_{\text{pim}} = \sum_{hkl} [1/(N-1)]^{1/2} \sum_i |I_{hkl,i} - \langle I_{hkl} \rangle| / \sum_{hkl} \sum_i I_{hkl,i}$ , where  $I_{hkl,i}$  is the scaled intensity of the  $i^{\text{th}}$  measurement of reflection  $h, k, l$ ,  $\langle I_{hkl} \rangle$  is the average intensity for that reflection, and  $N$  is the redundancy.  $R_{\text{pim}} = \sum_{hkl} (1/(n-1))^{1/2} \sum_i |I_{hkl,i} - \langle I_{hkl} \rangle| / \sum_{hkl} \sum_i I_{hkl,i}$ , where  $n$  is the redundancy.  $CC_{1/2}$  = Pearson Correlation Coefficient between two random half datasets.

<sup>c</sup>  $R_{\text{cryst}} = \sum_{hkl} |F_o - F_c| / \sum_{hkl} |F_o|$ , where  $F_o$  and  $F_c$  are the observed and calculated structure factors.

<sup>d</sup>  $R_{\text{free}}$  was calculated as for  $R_{\text{cryst}}$ , but on 5% of data excluded before refinement.

<sup>e</sup> The values are percentage of residues in the favored and outliers regions analyzed by MolProbity [1].

## REFERENCES

1. Chen VB, Arendall WB, 3rd, Headd JJ, Keedy DA, Immormino RM, et al. (2010) MolProbity: all-atom structure validation for macromolecular crystallography. *Acta Crystallogr D Biol Crystallogr* 66: 12-21.
