# Supplementary material for: Three mutations switch H7N9 influenza to human-type receptor specificity
Source: PubMed Central journal article supplement (PMC5472306; doi:10.1371/journal.ppat.1006390), 2017-06-15
Supplement: ppat.1006390.s003.pdf [file ppat.1006390.s003.pdf]

**S3 Table. Receptor binding of H7 mutants**

| HA    | ELISA-like assay |                | Glycan array |              |
|-------|------------------|----------------|--------------|--------------|
|       | $\alpha$ 2-3     | $\alpha$ 2-6   | $\alpha$ 2-3 | $\alpha$ 2-6 |
| WT    | ++ <sup>a</sup>  | - <sup>b</sup> | ++           | -            |
| G225D | ND <sup>c</sup>  | ND             | -            | -            |
| E190D | ND               | ND             | -            | -            |
| G225D | ND               | ND             | -            | -            |
| K193T | + <sup>d</sup>   | -              | -            | -            |
| V186K | -                | +              | -            | -            |
| V186K | +                | +              | -            | -            |
| G228S | +                | +              | -            | -            |
| V186G | -                | -              | +            | -            |
| V186G | +                | -              | +            | +            |
| G228S | +                | -              | +            | +            |
| V186G | -                | -              | -            | -            |
| K193T | -                | -              | -            | -            |
| V186N | -                | -              | -            | -            |
| N224K | -                | -              | -            | -            |
| N224K | ++               | ++             | ++           | -            |
| G228S | ++               | ++             | ++           | -            |

<sup>a</sup> Significant binding above  $1 \times 10^4$  RFUs (see Fig. S2)

<sup>b</sup> Signals below  $2 \times 10^3$  RFUs

<sup>c</sup> Not determined

<sup>d</sup> Significant binding below  $5 \times 10^3$  RFUs
