# Supplementary material for: Three mutations switch H7N9 influenza to human-type receptor specificity
Source: PubMed Central journal article supplement (PMC5472306; doi:10.1371/journal.ppat.1006390), 2017-06-15
Supplement: ppat.1006390.s004.pdf [file ppat.1006390.s004.pdf]

**S4 Table. Binding of Sh2 WT and Sh2 V186K-K193T-G228S variant HA to biotinylated  $\alpha$ 2-3 and  $\alpha$ 2-6 N-glycan receptors (quoted values are  $K_d$  apparent ( $\mu\text{g ml}^{-1}$ )  $\pm$  standard error):**

|                         | <b>Sh2</b>                    | <b>Sh2 G186K-K193T-G228S</b>  |
|-------------------------|-------------------------------|-------------------------------|
| <b>3SLN</b>             | 1.67 $\pm$ 0.16               | n/b*                          |
| <b>3SLN<sub>2</sub></b> | 2.59 $\pm$ 0.21               | n/b*                          |
| <b>3SLN<sub>3</sub></b> | 2.93 $\pm$ 0.23               | n/b*                          |
| <b>3SLN<sub>4</sub></b> | 2.37 $\pm$ 0.34               | n/b*                          |
| <b>6SLN</b>             | n/b*                          | n/b*                          |
| <b>6SLN<sub>2</sub></b> | 48.08 $\pm$ 9.74 <sup>#</sup> | 55.50 $\pm$ 7.86 <sup>#</sup> |
| <b>6SLN<sub>3</sub></b> | 8.74 $\pm$ 0.51               | 3.82 $\pm$ 0.24               |
| <b>6SLN<sub>4</sub></b> | 21.16 $\pm$ 2.72 <sup>#</sup> | 4.68 $\pm$ 0.31               |

\* n/b, no binding/insufficient to estimate  $K_d$ .

<sup>#</sup>  $K_d$  estimated via extrapolation to maximal binding.
